# Supplementary material
Source: MDPI journal article supplement (https://www.mdpi.com/2077-1444/11/6/314)
Supplement: s1 [file s1]

## Checklist

### 0. Demographie

#### Gegenwart

1. Kontaktinformation (ganzer Name, E-Mail, Telefon)
2. Wie alt sind Sie (wenn ich fragen darf)?
3. Was sind Ihre sexuelle Orientierung?
4. Was sind Ihre Nationalität und Ethnizität?
5. Was sind Ihre Zivilstand?
6. Was sind Ihre gegenwärtige Größe und Gewicht?
7. Sind Sie Vegetarier oder Veganer? Habe Sie Lebensmittelallergien oder andere Allergien?
8. Wie oft machen Sie Sport? Was für Sport?
9. Was machen Sie gerade beruflich?
10. Was ist Ihr Bildungsstand?
11. Nehmen Sie gerade Medikamente?

#### Vergangenheit

1. Wie würden Sie ihre Kindheit beschreiben?
2. Würden Sie sich mehr als introvertiert oder extrovertiert beschreiben, als sie heranwachsend war?
3. Was war die religiöse Orientierung Ihrer Eltern oder Haushalts?
4. Wurden Sie jemals mit einer mentalen Krankheit diagnostiziert? Jemand in Ihrer nächsten Familie?
5. Wurden Sie als Kind physisch, sexuell, oder emotional missbraucht?
6. Haben Sie je illegale Drogen genommen?
7. Wie alt waren Sie als Sie angefangen haben zu meditieren? Warum haben Sie angefangen?
8. Können Sie kurz die Geschichte Ihrer Meditationspraxis zusammenfassen, inklusive Übungen, Lehrer, Retreat-Center, Traditionen, und Menge. Was sind die Hauptübungen und Lehrer, und was ist ihre Haupttradition?

**Erster Bereich: Phänomenologie der Erfahrungen.** Frei von Interpretation soweit möglich, fokussiert auf die Beobachtungsebene.

1. Zu den Erfahrungen selbst:
  - a. Haben Sie schwierige, herausfordernde, oder unangenehme Erfahrungen gehabt?
  - b. Haben Sie unerwartete Erfahrungen gehabt?
  - c. Haben Sie besonders angenehme oder erfreuliche Erfahrungen gehabt?
2. Welchen Einfluss haben die Erfahrungen auf Ihr Leben gehabt?
3. Warum stellen Sie eine Verbindung zwischen Erfahrung und Meditationsübung her? Wurde versucht, die Übung zu beenden ("De-Test")? Ist die Erfahrung wieder aufgetreten, wenn Sie mit der Übung wieder begonnen haben ("Re-Test")?

**Zweiter Bereich: Interpretationen.** Einige Erfahrungen können als notwendige und zu erwartende Herausforderungen betrachtet werden, andere als Störungen, die behoben werden sollen.

*Erste Frage:* Wie verstehen Sie die Erfahrungen? Oder, welche Bedeutung haben die Erfahrungen für Sie?

*Zweite Frage:* Warum denken Sie, dass meditative Übung der Auslöser der Erfahrung war? Gibt es psychologische Faktoren oder Verhaltensfaktoren, die die Meditationserfahrung beeinflusst oder geformt haben können?

### **Dritter Bereich: Maßnahmen**

*Frage:* Wie haben Sie sich als Reaktion auf diese Erfahrungen verhalten? Falls Maßnahmen notwendig gewesen sind, welche Strategien waren für Sie hilfreich, und welche nicht?

Empfehlungen und andere Kommentare:

1. Was würde am meisten helfen, um mit diesen Erfahrungen umzugehen? Wenn die Erfahrung zum unnötigen Leiden geführt hat, was hätte das Leiden verhindert?
2. Welche neuen Einrichtungen wären hilfreich für andere, die solche Erfahrungen machen?

3. Welche anderen Arten der Meditationsforschung wünschen Sie sich, oder finden Sie besonders wichtig?
4. Haben Sie andere Kommentare, Fragen, Vorschläge?
